# Supplementary material for: Accounting for polarization in the calibration of a donut beam axial optical tweezers
Source: PLOS journal article supplement (doi:10.1371/journal.pone.0193402), 2018-02-23
Supplement: S1 (10.1371/journal.pone.0193402.s001) [file journal.pone.0193402.s001]

## S1. OPTIMIZING THE MODE PURITY

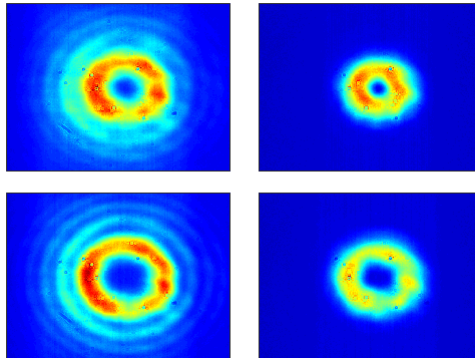

FIG. S1. Far-field intensity profiles (Left) before and (Right) after modifying the hologram to encode amplitude information to purify the  $LG_0^l$  mode. The profiles for (Top)  $l = 1$  and (Bottom)  $l = 2$  are shown.

A Gaussian beam incident on a forked grating with topological charge  $l$  produces a field  $U_l$  in the Fourier plane that is actually a superposition of Laguerre-Gaussian modes with azimuthal order  $l$  and radial orders  $p$ :

$$U_l(r, \theta) = \sum_p C_p^l LG_p^l(r, \theta), \quad (1)$$

where  $C_p^l$  is a coefficient determining the amplitude of each mode and

$$LG_p^l(r, \phi) \propto \left(\frac{\sqrt{2}r}{w_0}\right)^{|l|} \exp\left(-\frac{r^2}{w_0^2}\right) L_p^{|l|}\left(\frac{2r^2}{w_0^2}\right) \exp(-il\phi), \quad (2)$$

where  $w_0$  is the beam waist and  $L_p^l$  are generalized Laguerre polynomials [1]. For low values of  $l$ , the majority of the power ends up in the  $p = 0$  mode, which corresponds to a single ring, but a portion of the intensity goes into higher radial modes [2, 3]. One approach to purifying the lowest mode is to encode amplitude information in the phase-only hologram. This can be achieved by spatially modulating the diffraction efficiency of the blazed grating imprinted on the SLM. There are a number of ways to implement this approach [3, 4]. One of the most efficient ways to encode the amplitude profile  $A$ , so as to maintain the intensity of the final hologram, is as follows:

$$\Psi = \psi + f(A) \sin(\psi), \quad (3)$$

where  $J_0[f(A)] = A$  and  $J_0$  is the zeroth order Bessel function of the first kind [4]. Thus, single ring intensity profiles are produced by setting  $A = |LG_0^l|$ . Figure S1 shows the intensity profiles for  $l = 1$  and  $l = 2$ , before and after the addition of the amplitude mask. The higher order radial modes, seen as additional outer rings, vanish with the mask applied.

- 
- [1] Karimi E, Zito G, Piccirillo B, Marrucci L, Santamato E. Hypergeometric-gaussian modes. *Opt Lett.* 2007;32(21):30533055.
  - [2] Sephton B, Dudley A, Forbes A. Revealing the radial modes in vortex beams. *Appl Optics.* 2016;55(28):78307835.
  - [3] Ando T, Ohtake Y, Matsumoto N, Inoue T, Fukuchi N. Mode purities of Laguerre-Gaussian beams generated via complex-amplitude modulation using phase-only spatial light modulators. *Opt Lett.* 2009;34(1):3436.
  - [4] Arrizon V, Ruiz U, Carrada R, Gonzalez LA. Pixelated phase computer holograms for the accurate encoding of scalar complex fields. *J Opt Soc Am A.* 2007;24(11):3500 3507.
